# Supplementary material for: Reduced cell surface levels of GPI‐linked markers in a new case with PIGG loss of function
Source: PubMed Central journal article supplement — Hum Mutat. 2017 Jun 12;38(10):1394–401. doi: 10.1002/humu.23268 (PMC6180480; doi:10.1002/humu.23268), 2017-06-12
Supplement: HUMU-38-1394-s001.pdf [file HUMU-38-1394-s001.pdf]

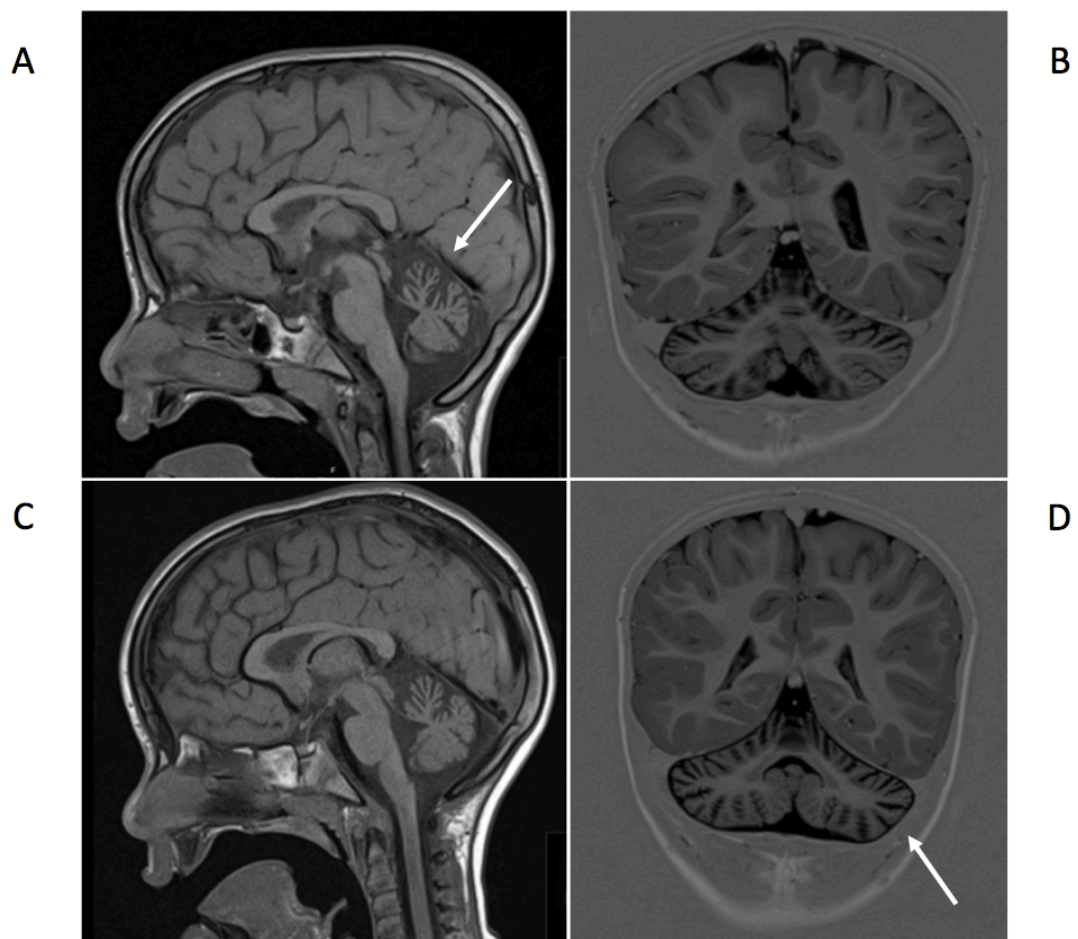

### Supplementary Figure S1

MRI image of (A, B) II:2 at age 5 years and 9 months and (C, D) II:3 at age 2 years and 9 months showing cerebellar atrophy with prominent sulci, atrophic cortex and white matter loss.

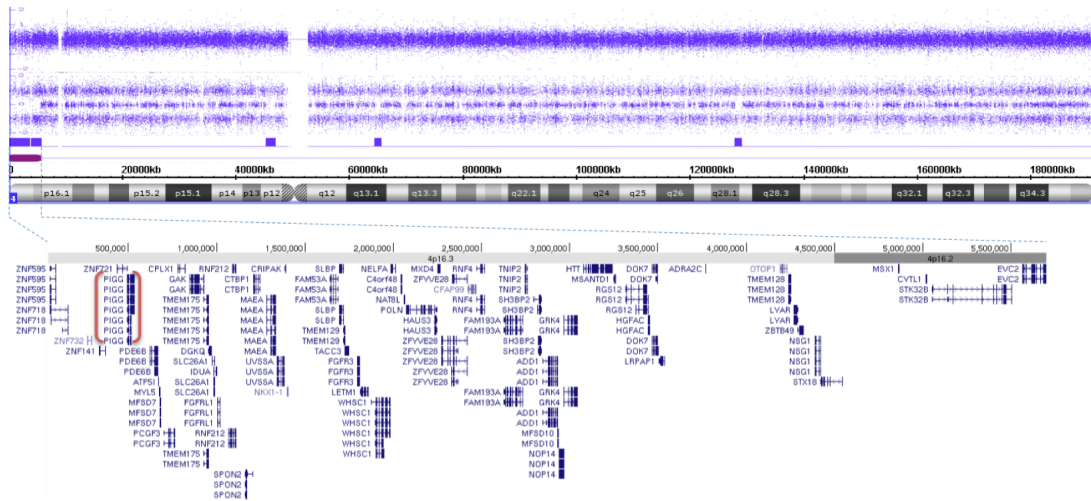

## Supplementary Figure S2

Chromosomal microarray results from patient II:2 of the detected homozygous region at 4p16.3p16.2, with a focused view of the genes encompassed by the homozygous stretch (adapted from UCSC genome browser, assembly GRCh37/hg19).

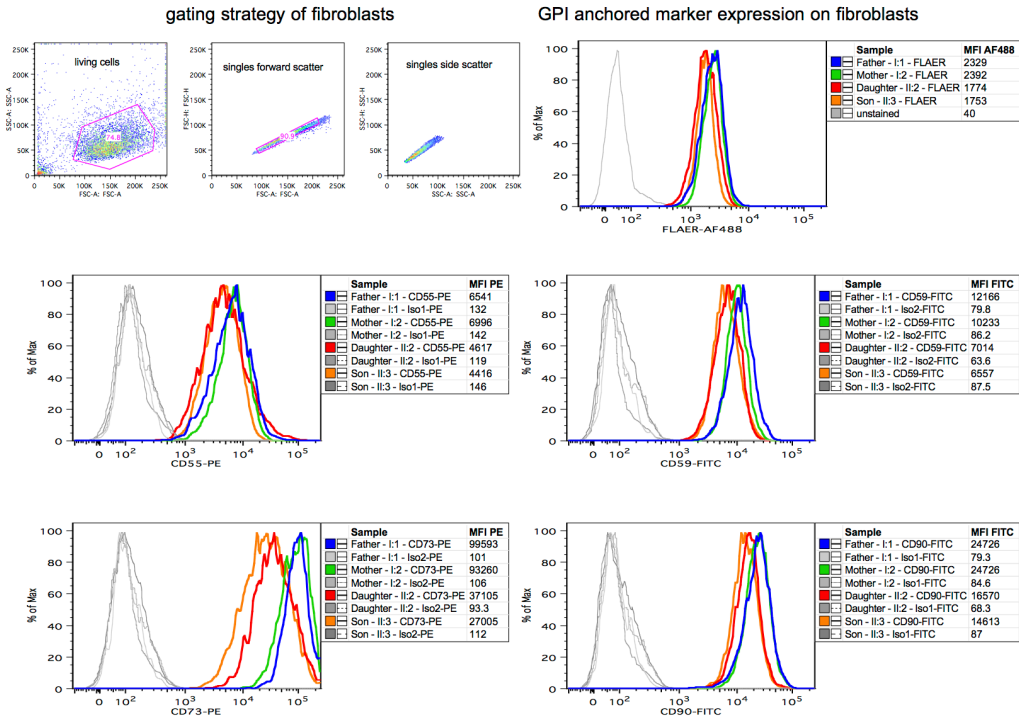

### Supplementary Figure S3A

Flow cytometry gating strategy for single fibroblasts and histograms representing median fluorescence intensity (MFI) of GPI anchored marker expression. Patient fibroblasts and control fibroblasts were stained with anti-CD55, anti-CD59, anti-CD73, anti-CD90, and fluorescence-labeled aerolysin (FLAER).

gating strategy for granulocytes

GPI anchored marker expression on granulocytes

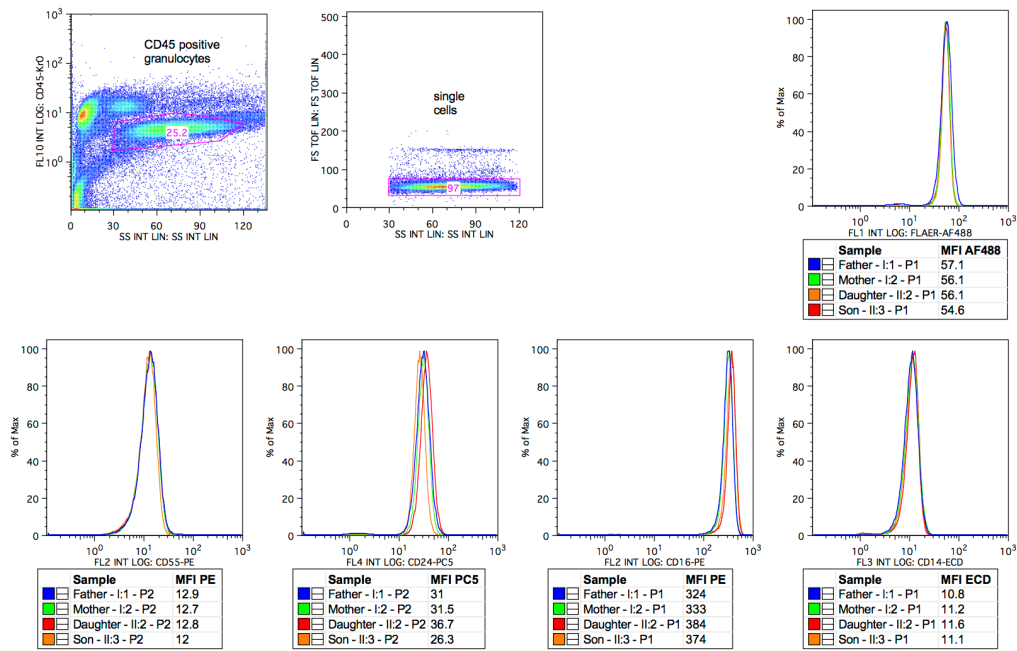

Supplementary Figure S3B

Flow cytometry gating strategy for granulocytes from blood samples and histograms representing median fluorescence intensity (MFI) of GPI anchored marker expression
